# Supplementary material for: Associations of Pre-Pregnancy BMI, Gestational Weight Gain and Maternal Parity with the Trajectory of Weight in Early Childhood: A Prospective Cohort Study
Source: PubMed Central journal article supplement (PMC6480263; doi:10.3390/ijerph16071110), 2019-03-28
Supplement: ijerph-16-01110-s001.pdf [file ijerph-16-01110-s001.pdf]

**Table S1.** Non-response analysis for missing data group and non-missing group

| Variable                                              | Non-missing<br>(n=128) | Missing<br>(n=765) | Statistics | P     |
|-------------------------------------------------------|------------------------|--------------------|------------|-------|
| Male, No. (%)                                         | 400(52.7)              | 69(54.3)           | 0.1        | 0.73  |
| Maternal education, No. (%)                           |                        |                    |            |       |
| Junior or below                                       | 28(3.7)                | 3(2.4)             |            |       |
| High school                                           | 86(11.4)               | 24(19.1)           | 6.2        | 0.04  |
| College or above                                      | 643(84.9)              | 99(78.6)           |            |       |
| Paternal education, No. (%)                           |                        |                    |            |       |
| Junior or below                                       | 24(3.2)                | 5(3.9)             |            |       |
| High school                                           | 75(9.9)                | 28(22.1)           | 16.1       | <0.01 |
| College or above                                      | 658(86.9)              | 94(74.0)           |            |       |
| Family income, mean (SD), yuan                        |                        |                    |            |       |
| ≤5000                                                 | 415(55.9)              | 71(56.8)           |            |       |
| 5001-1000                                             | 298(40.1)              | 48(38.4)           | 0.2        | 0.89  |
| ≥10001                                                | 30(4.0)                | 6(4.8)             |            |       |
| Pre-pregnancy BMI group, mean (SD), kg/m <sup>2</sup> |                        |                    |            |       |
| <18.5                                                 | 148(19.4)              | 21(16.4)           |            |       |
| 18.5-23.9                                             | 497(65.0)              | 87(68.0)           | 4.1        | 0.25  |
| 24-27.9                                               | 95(12.4)               | 12(9.4)            |            |       |
| ≥28                                                   | 25(3.3)                | 8(6.3)             |            |       |
| GWG group, mean (SD),kg                               |                        |                    |            |       |
| Inadequate                                            | 160(21.0)              | 26(20.3)           |            |       |
| Adequate                                              | 350(45.9)              | 62(48.4)           | 0.3        | 0.87  |
| Excessive                                             | 252(33.1)              | 40(31.2)           |            |       |
| Multiparous, No. (%)                                  | 230(30.1)              | 36(28.1)           | 0.2        | 0.66  |
| Maternal age, mean (SD), year                         | 29.8(3.8)              | 30.5(4.5)          | -1.6       | 0.11  |
| Gestational week, median (IQR), week                  | 39.0(1.4)              | 38.9(1.5)          | 0.8        | 0.45  |
| Pre-pregnancy-BMI, mean (SD), kg/m <sup>2</sup>       | 21.2(3.0)              | 21.4(3.2)          | -0.6       | 0.56  |
| Birth weight, mean (SD),kg                            | 3.4(0.6)               | 3.3(0.5)           | 0.6        | 0.52  |
| weight01, mean (SD),kg                                | 4.5(0.6)               | 4.5(0.6)           | 0.5        | 0.59  |
| weight03, mean (SD),kg                                | 6.7(0.8)               | 6.7(0.7)           | -1.0       | 0.31  |
| weight06, mean (SD),kg                                | 8.2(0.9)               | 8.2(0.8)           | -0.2       | 0.89  |
| weight08, mean (SD),kg                                | 8.9(1.0)               | 9.0 (1.0)          | -0.7       | 0.52  |
| weight12, mean (SD),kg                                | 9.9(3.2)               | 9.7(0.9)           | 1.6        | 0.10  |
| weight18, mean (SD),kg                                | 11.1(1.2)              | 10.9(1.4)          | 0.8        | 0.45  |

Abbreviation: GWG, gestational weight gain; weight01-weight18, child weight at the ages of 1 to 18 months.

**Table S2.** Correlation coefficients between maternal prepregnancy BMI, GWG and child weight from birth to 18 months old

|                  | Prepregnancy BMI | GWG       | Birth weight | Weight01 | Weight03 | Weight06 | Weight08 | Weight12 | Weight18 |
|------------------|------------------|-----------|--------------|----------|----------|----------|----------|----------|----------|
| Prepregnancy BMI | 1.000            | -0.163*** | 0.211***     | 0.099**  | 0.094**  | 0.097**  | 0.082*   | 0.104*** | 0.126*** |
| GWG              | -0.163***        | 1.000     | 0.151***     | 0.082*   | 0.031    | 0.029    | 0.050    | 0.073*   | -0.013   |
| Birth-weight     | 0.211***         | 0.151***  | 1.000        | 0.663*** | 0.418*** | 0.369*** | 0.348*** | 0.305*** | 0.286*** |
| weight01         | 0.099**          | 0.082**   | 0.663***     | 1.000    | 0.509*** | 0.428*** | 0.401*** | 0.330*** | 0.296*** |
| weight03         | 0.094**          | 0.031     | 0.418***     | 0.509*** | 1.000    | 0.687*** | 0.658*** | 0.509*** | 0.487*** |
| weight06         | 0.097**          | 0.029     | 0.369***     | 0.428*** | 0.687*** | 1.000    | 0.818*** | 0.681*** | 0.626*** |
| weight08         | 0.082**          | 0.050     | 0.348***     | 0.401*** | 0.658*** | 0.818*** | 1.000    | 0.725*** | 0.672*** |
| weight12         | 0.104***         | 0.073*    | 0.305***     | 0.330*** | 0.509*** | 0.681*** | 0.725*** | 1.000    | 0.722*** |
| weight18         | 0.126***         | -0.013    | 0.286***     | 0.296*** | 0.487*** | 0.626*** | 0.672*** | 0.722*** | 1.000    |

Abbreviation: GWG, gestational weight gain; weight01-weight18: child weight at the ages of 1 to 18 months

\*P<0.05, \*\*P<0.01, \*\*\*P<0.001.
